# Supplementary figures and images for: Exon junction complex proteins bind nascent transcripts independently of pre-mRNA splicing in Drosophila melanogaster
Source: eLife journal article supplement (doi:10.7554/elife.19881), 2016-11-23

Figure 1- figure supplement 2

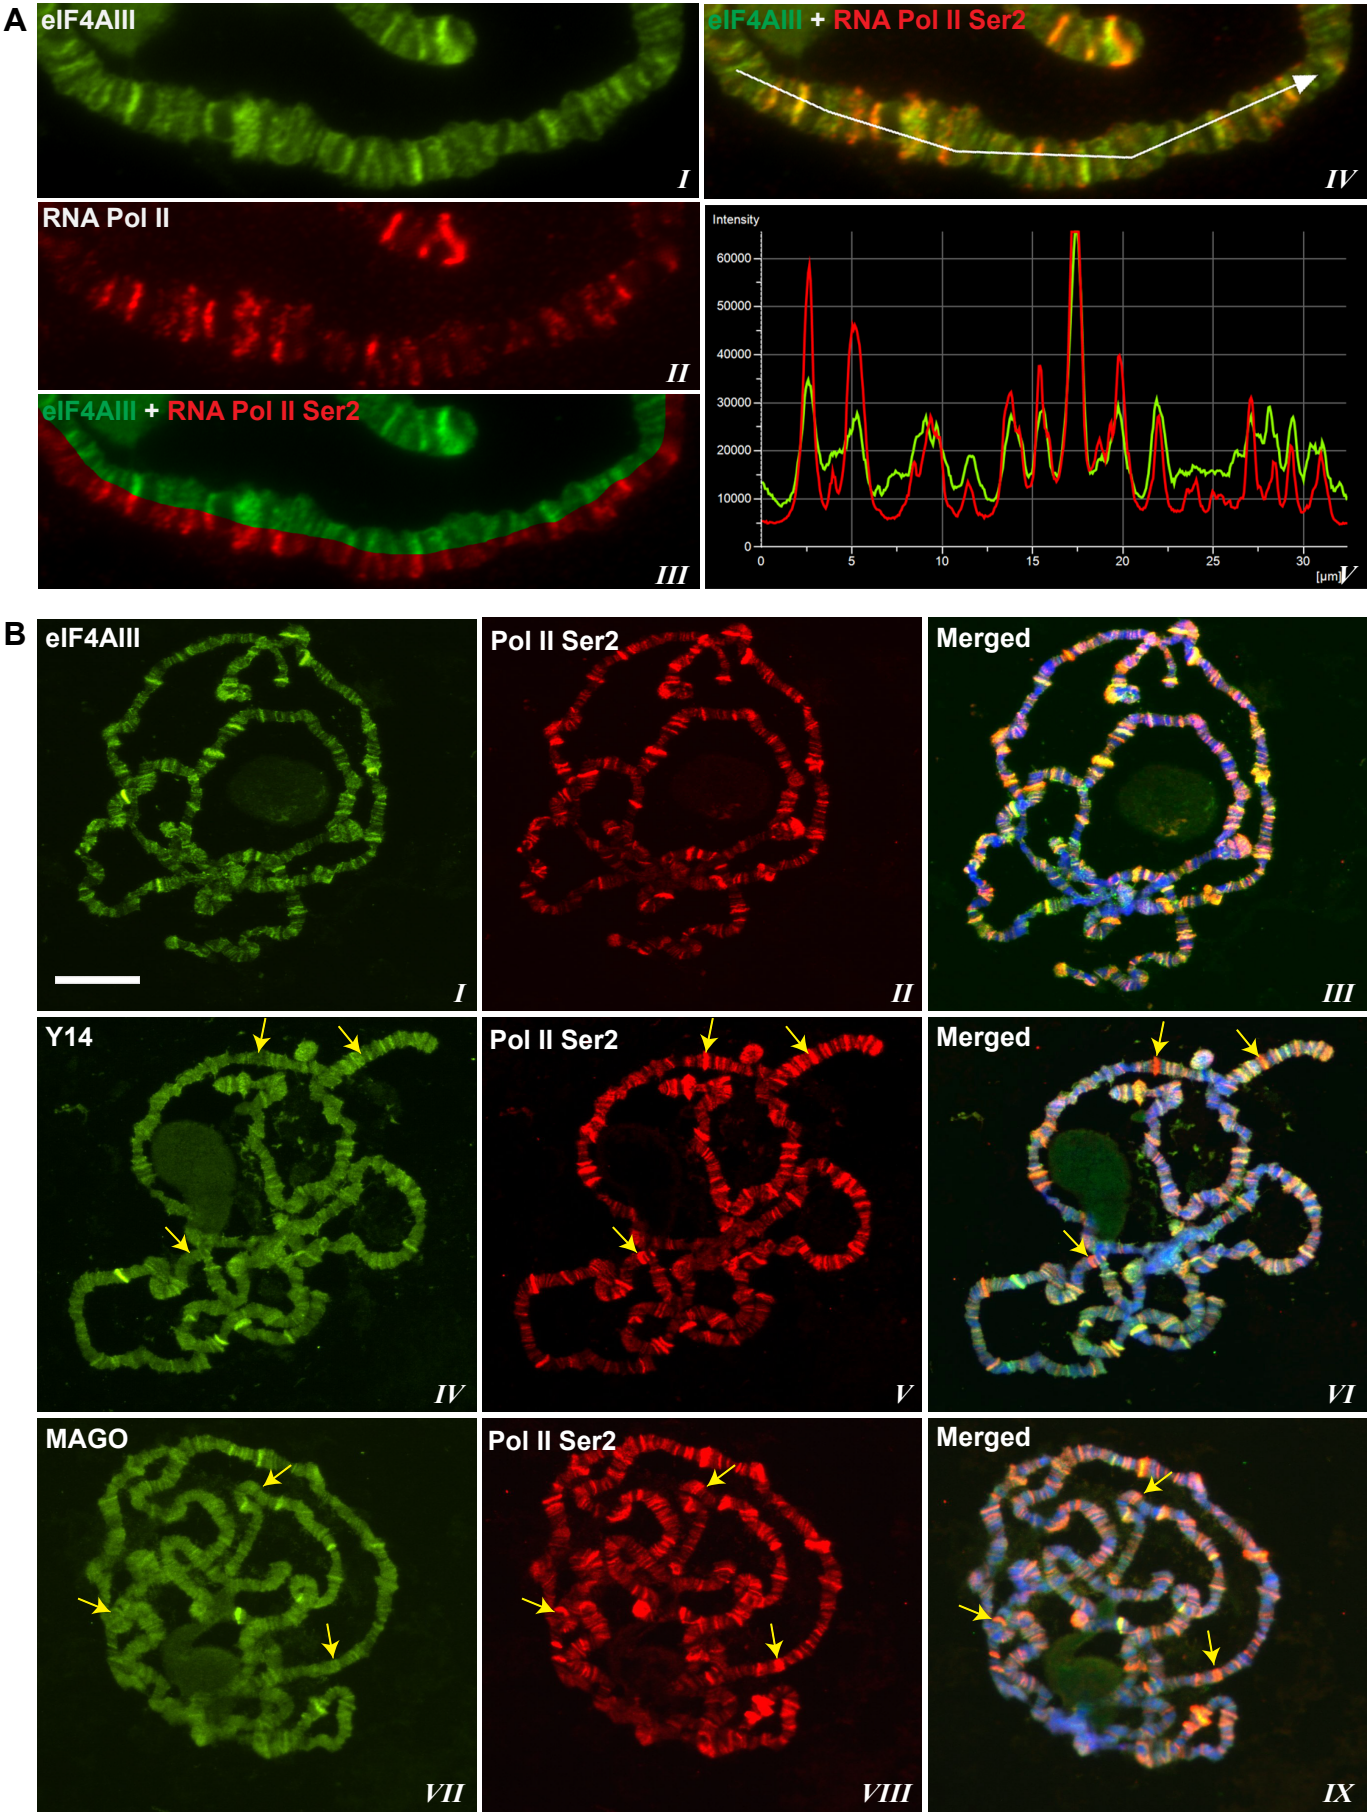

Supplement: supp [file elife-19881-supp-v1.zip]

Figure 1- figure supplement 4

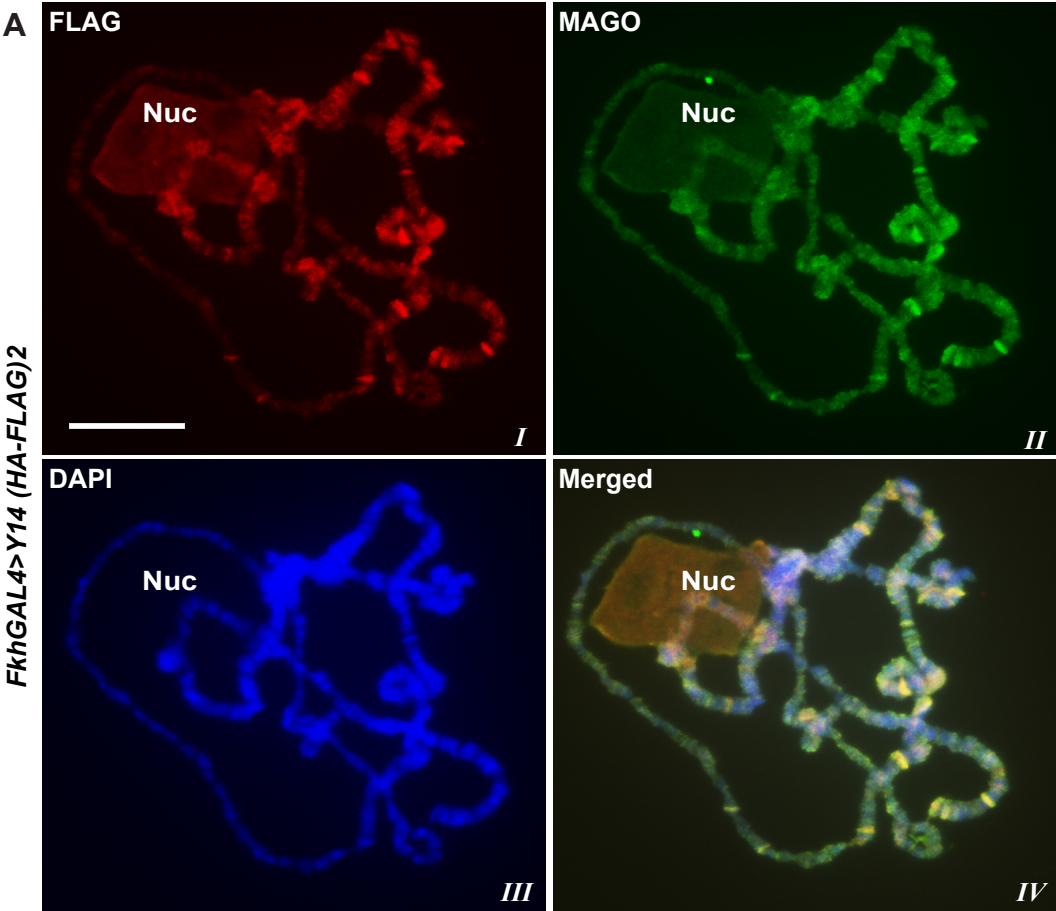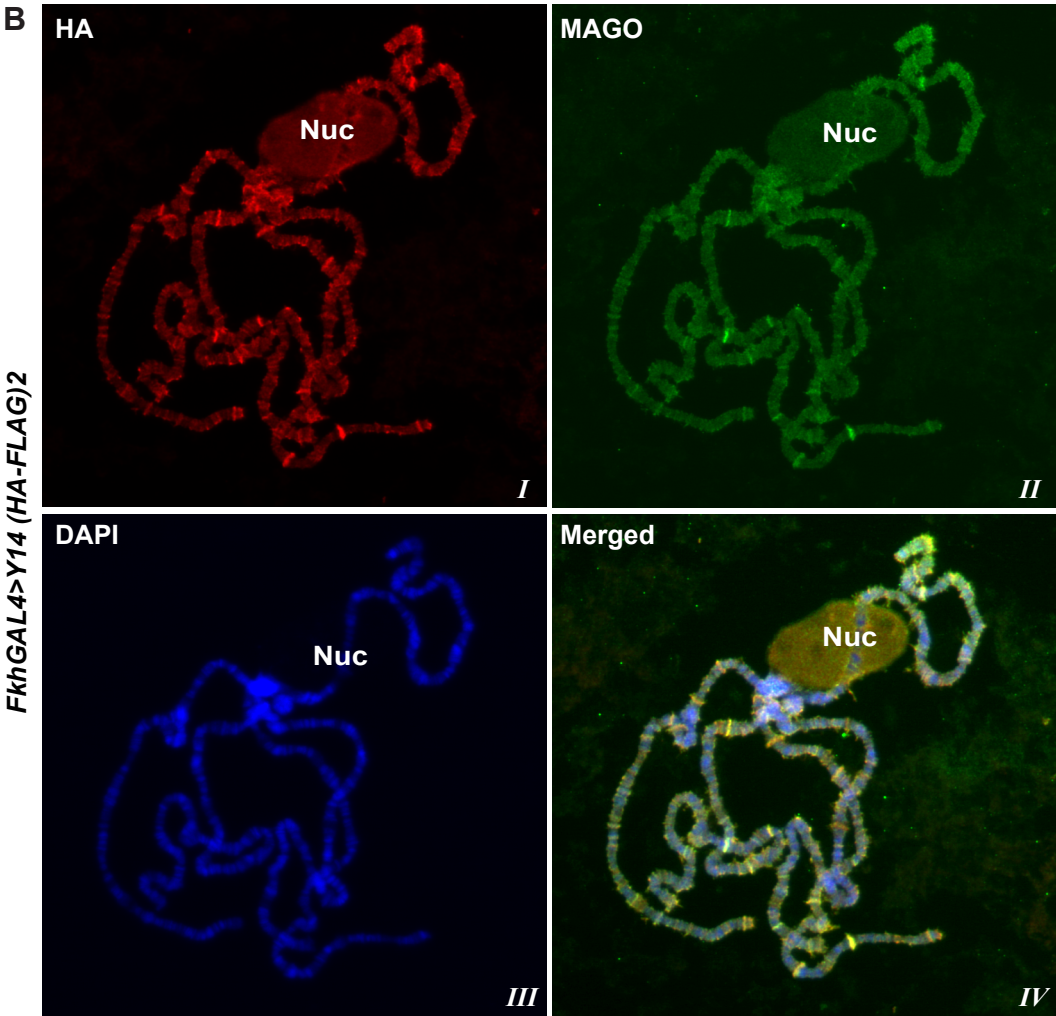

Supplement: supp [file elife-19881-supp-v1.zip]

Figure 1- figure supplement 1

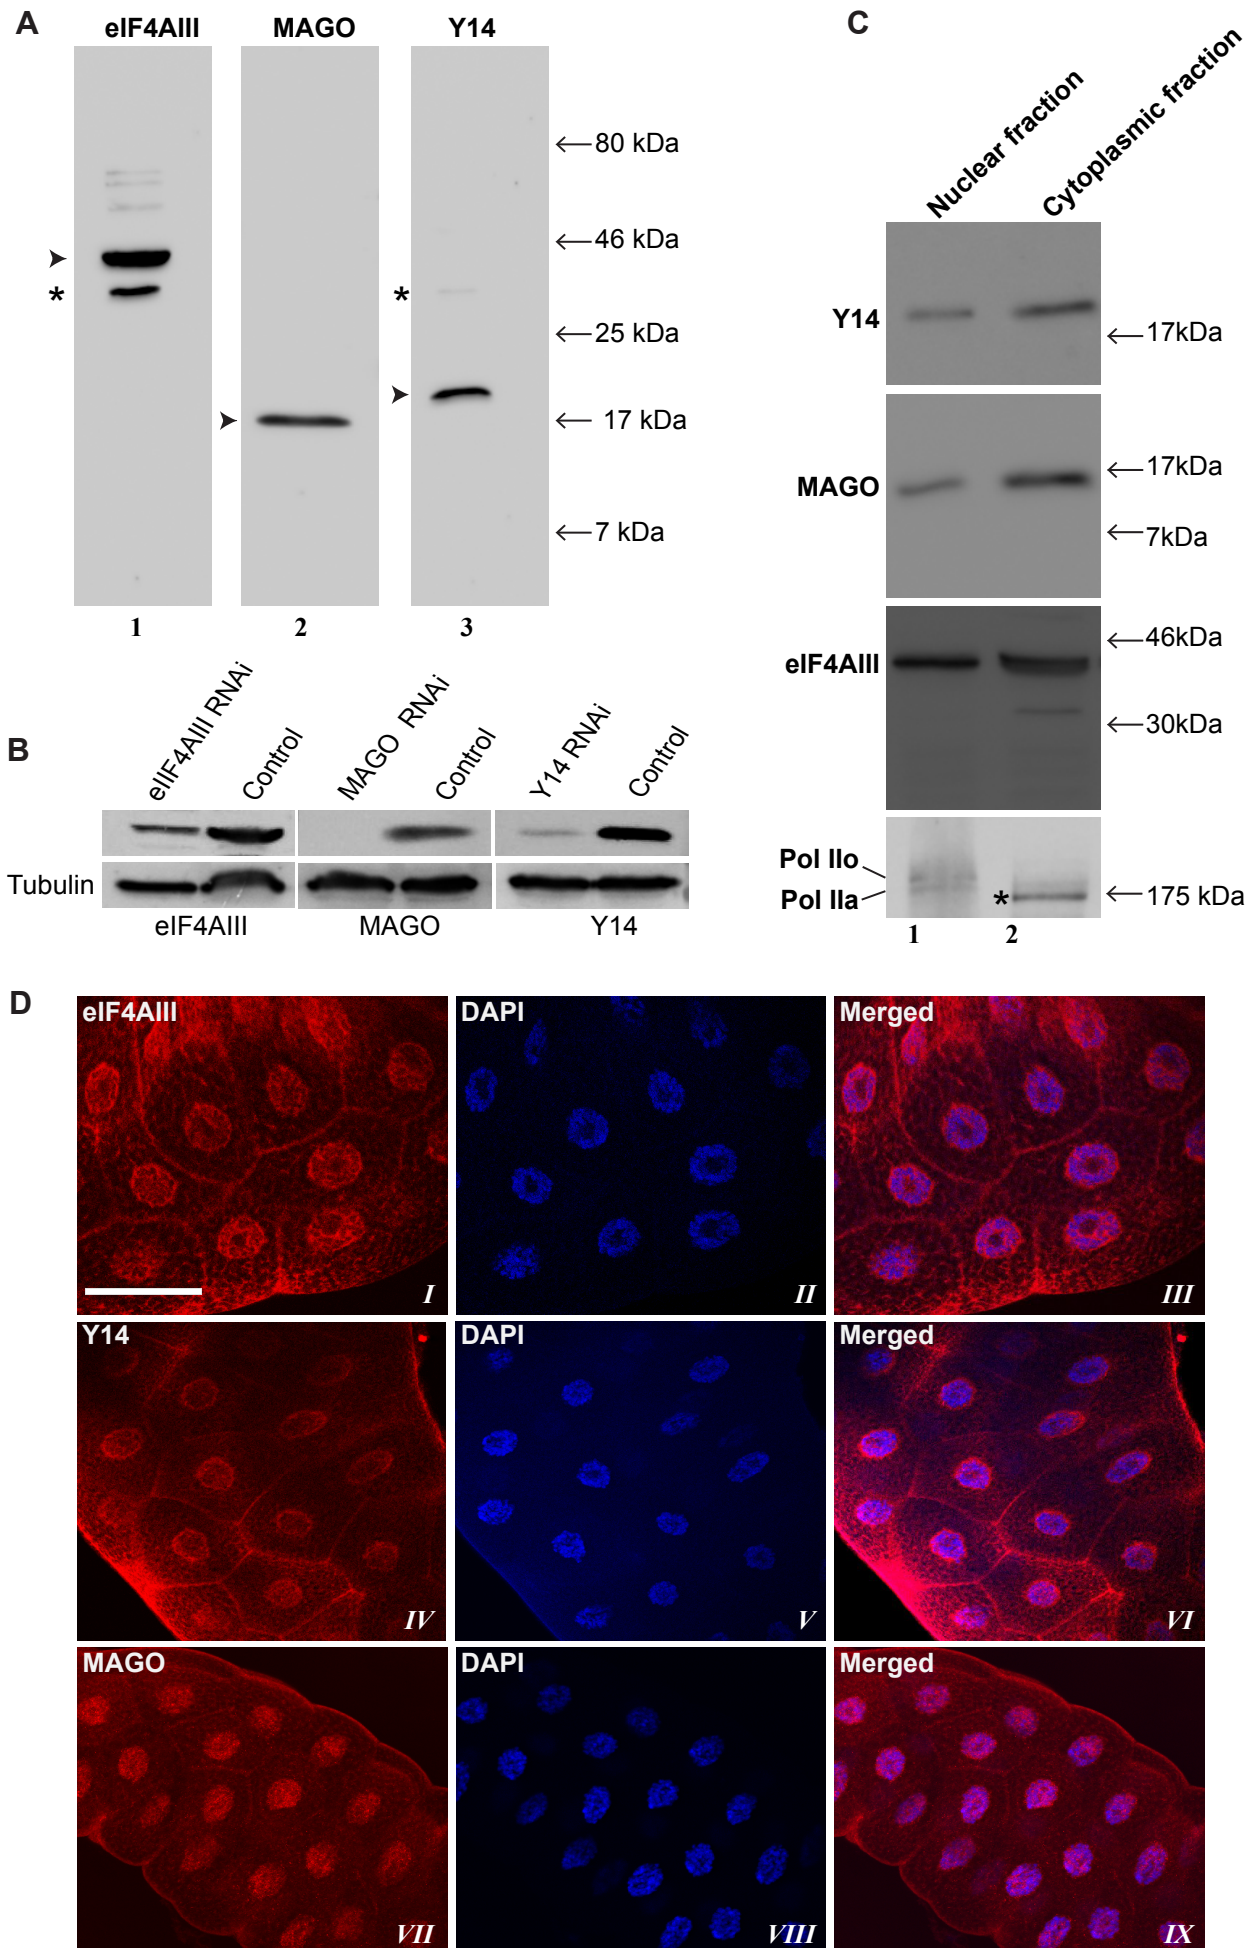

Supplement: supp [file elife-19881-supp-v1.zip]

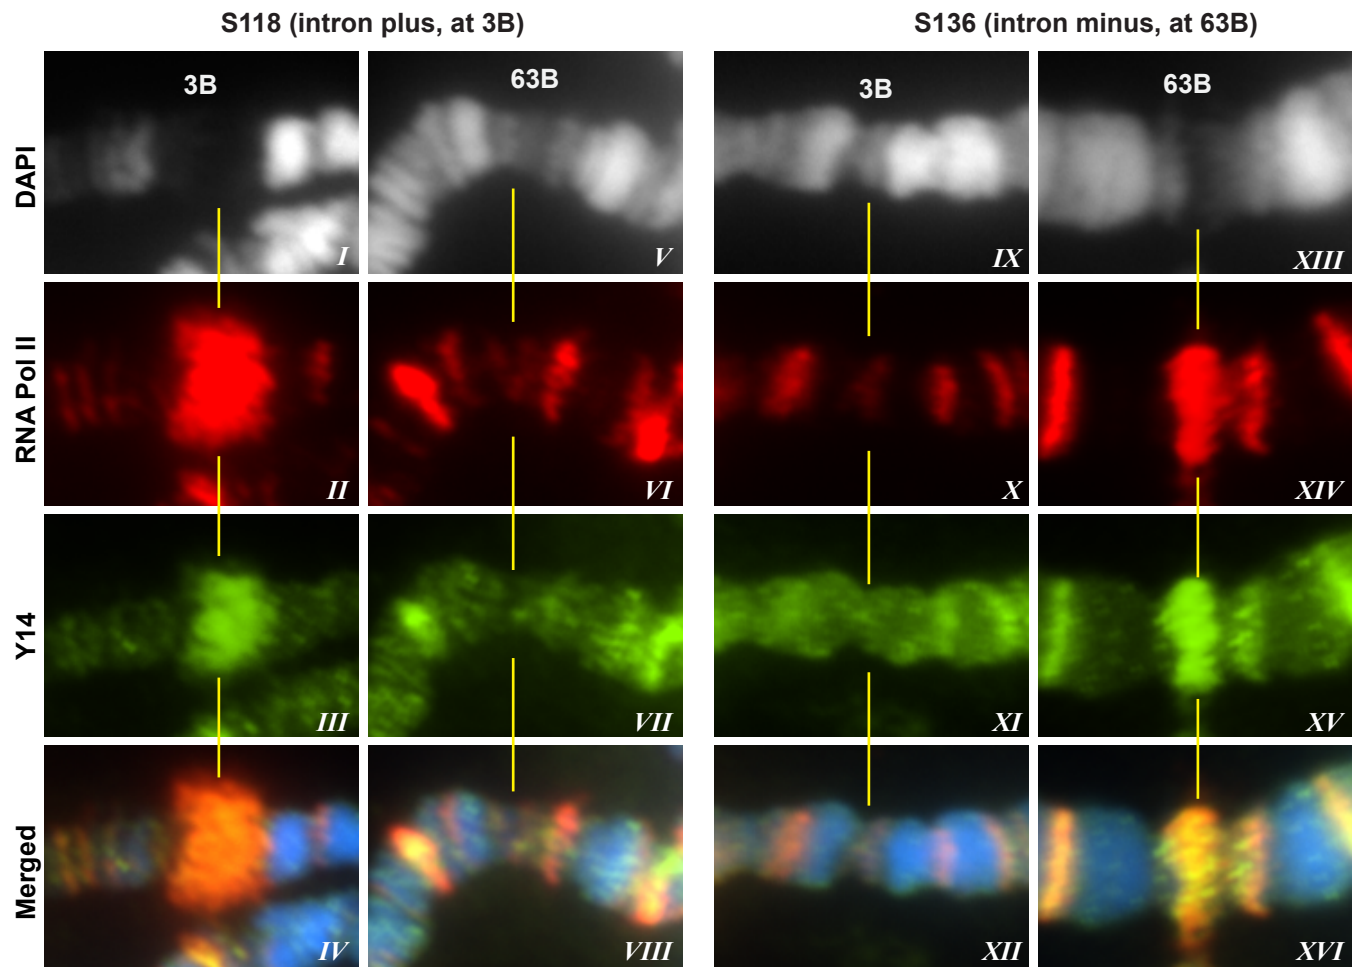

Supplement: supp [file elife-19881-supp-v1.zip]

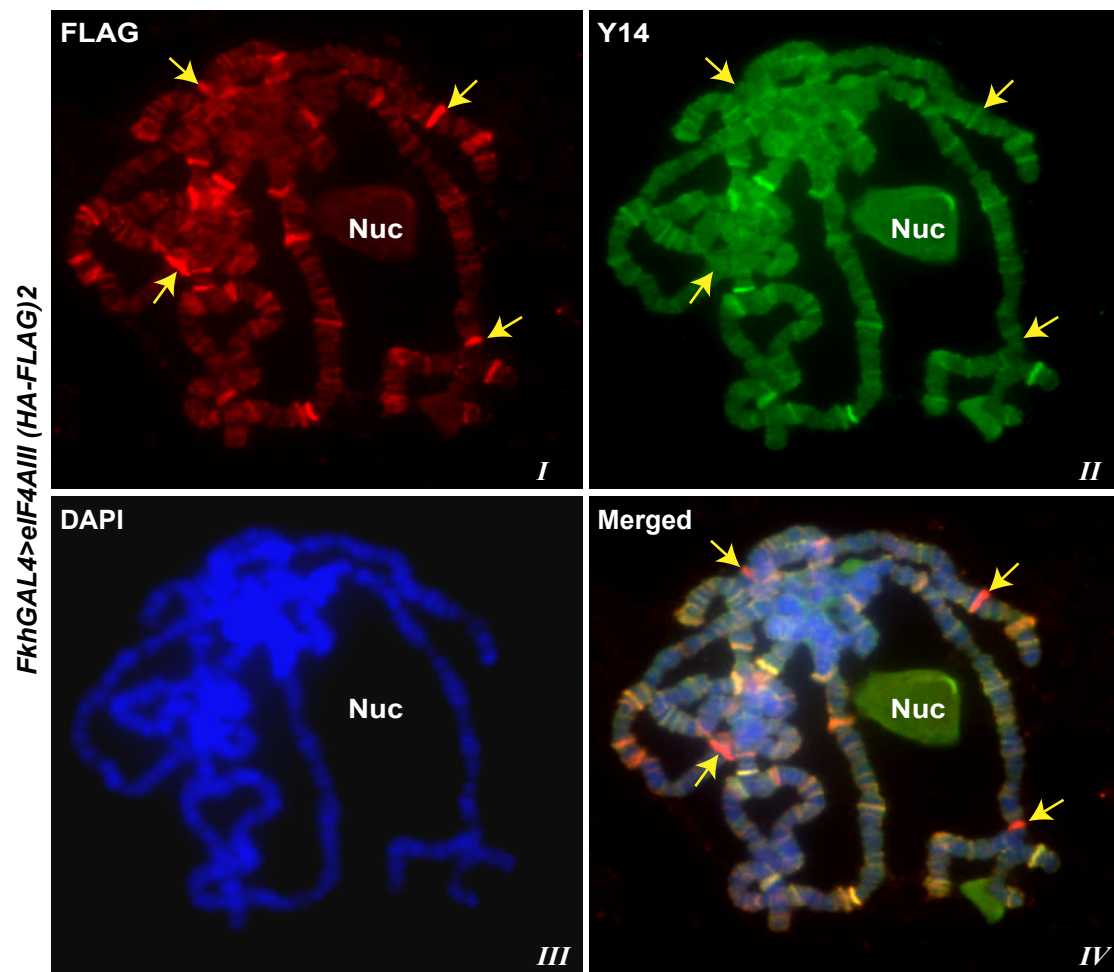

Supplement: supp [file elife-19881-supp-v1.zip]

*tubulin-GAL80ts; +; fkh-GAL4>eIF4AIII-RNAi*

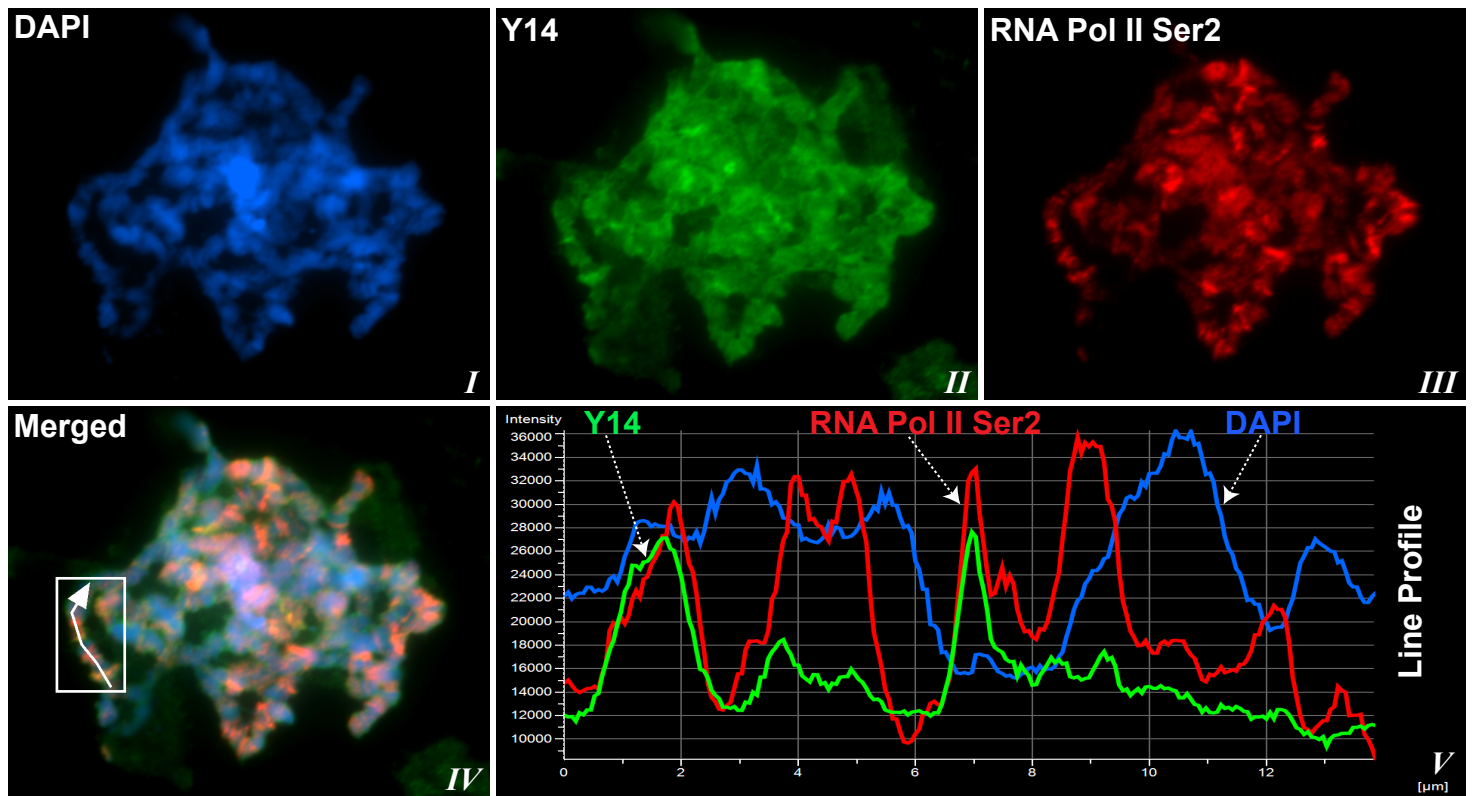

Supplement: supp [file elife-19881-supp-v1.zip]

Figure 4- figure supplement 1

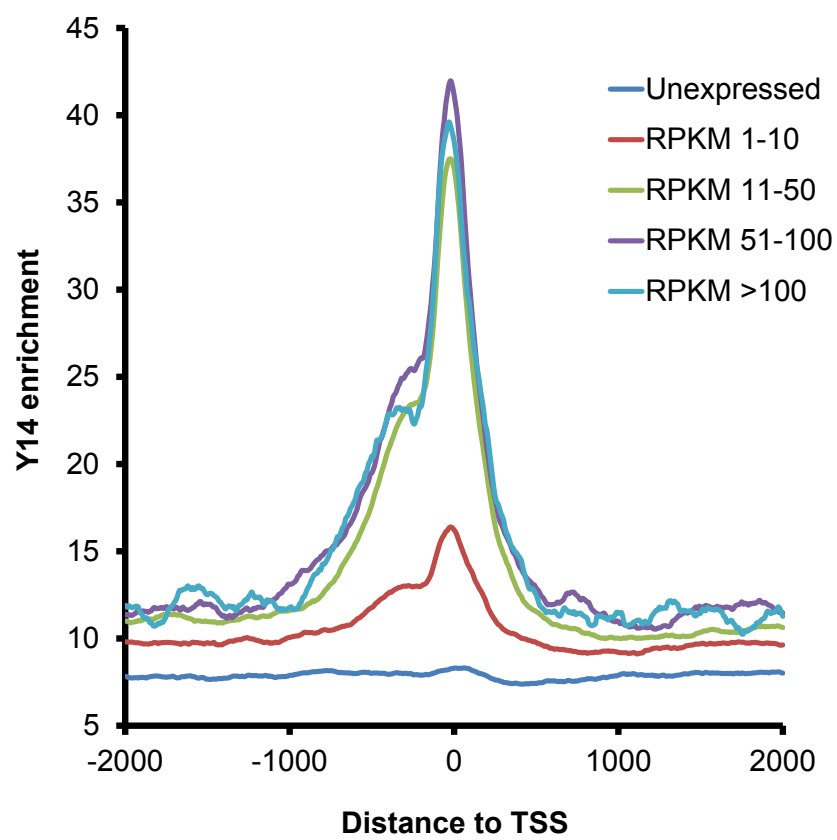

Supplement: supp [file elife-19881-supp-v1.zip]

Figure 1- figure supplement 3

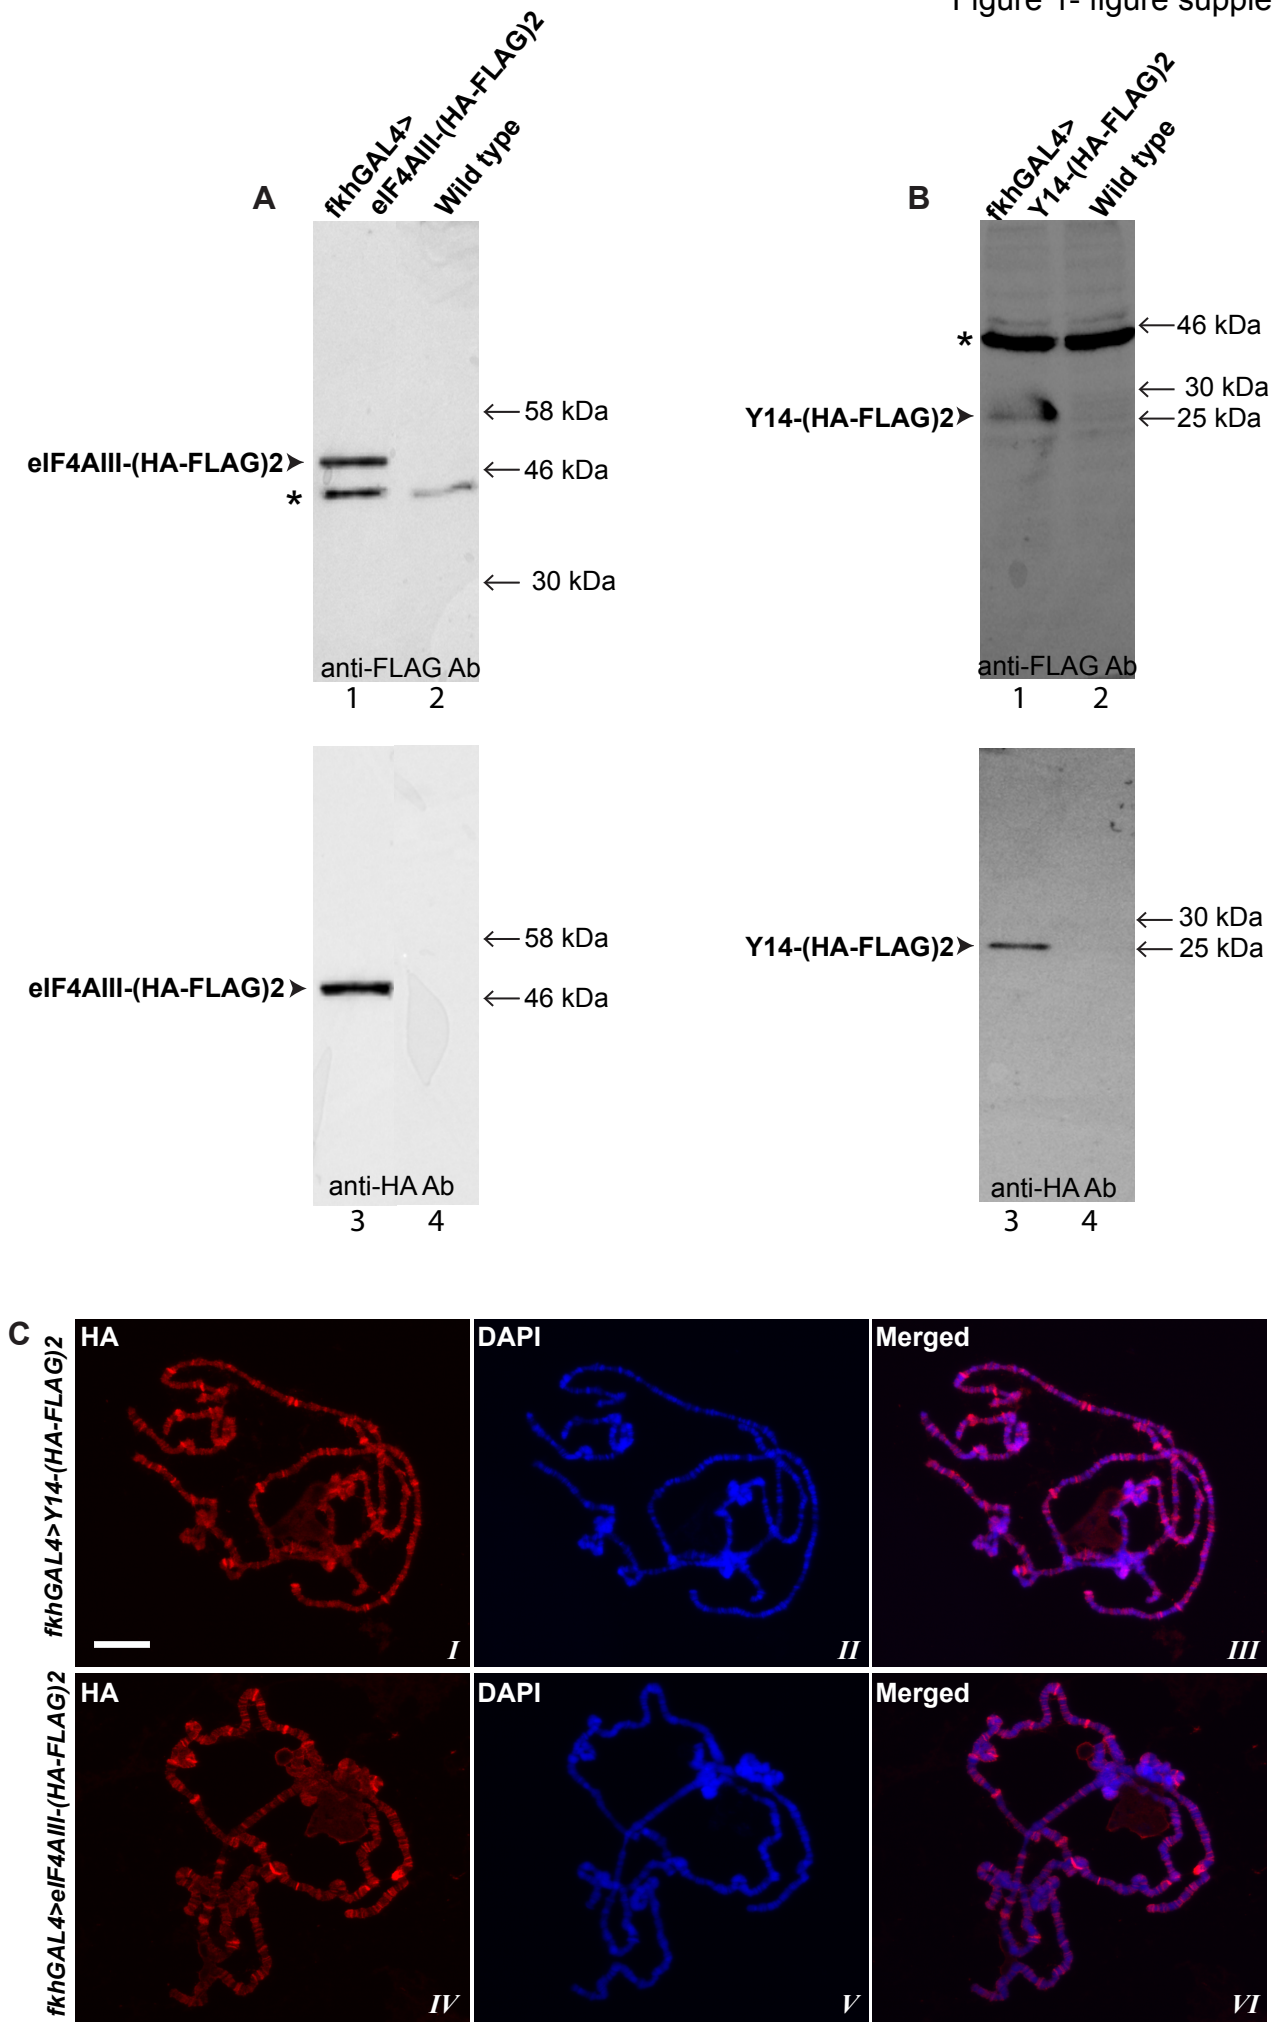

Supplement: supp [file elife-19881-supp-v1.zip]

Figure 4- figure supplement 2

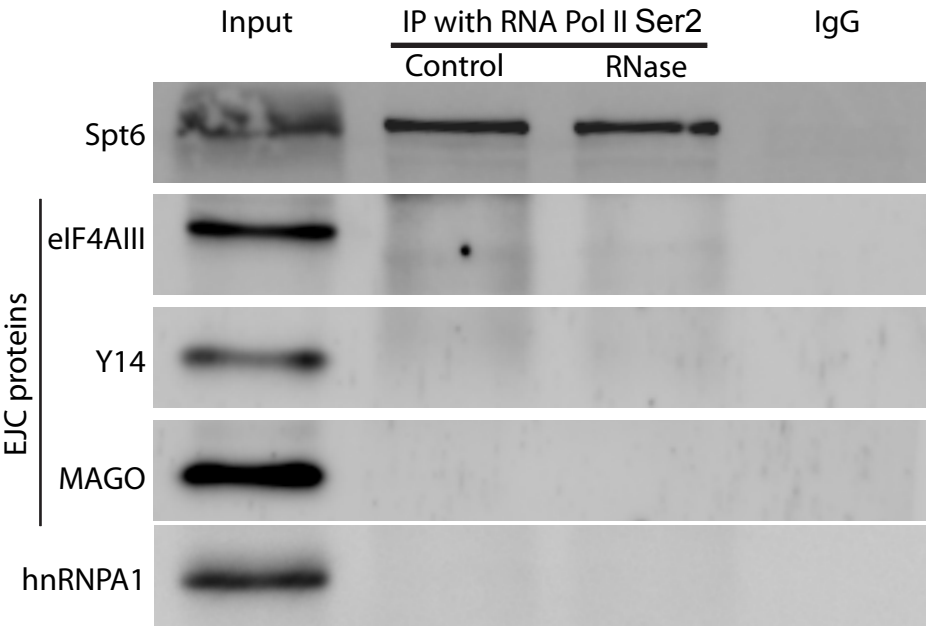

Supplement: supp [file elife-19881-supp-v1.zip]
